# Supplementary material for: Sss1p Is Required to Complete Protein Translocon Activation
Source: PubMed Central journal article supplement — J Biol Chem. 2010 Aug 13;285(42):32671–7. doi: 10.1074/jbc.M110.128256 (PMC2952269; doi:10.1074/jbc.m110.128256), 2010-08-13
Supplement: supp_M110.128256_Suppdata.pdf [file supp_M110.128256_Suppdata.pdf]

# Supplemental Data

## Sss1p is required to complete protein translocon activation

**Barrie M. Wilkinson, Judith K. Brownsword, Carl J. Mousley<sup>1</sup>, and Colin  
J. Stirling**

From the Faculty of Life Sciences, Michael Smith Building, University of Manchester, Oxford Road,  
Manchester, M13 9PT, U.K. and the <sup>1</sup>Department of Cell and Developmental Biology, Lineberger  
Comprehensive Cancer Center, University of North Carolina School of Medicine, Chapel Hill, NC  
27599-7090, USA.

Running head: The role of Sss1p in ER protein translocation

Address correspondence to: Professor Colin J. Stirling, Faculty of Life Sciences, Michael  
Smith Building, The University of Manchester, Oxford Road, Manchester, M13 9PT, UK.  
Phone: 44-161-275-5104, Fax: 44-161-275-5082 E-mail: [colin.stirling@manchester.ac.uk](mailto:colin.stirling@manchester.ac.uk)

This PDF file contains

Figure S1

Table S1

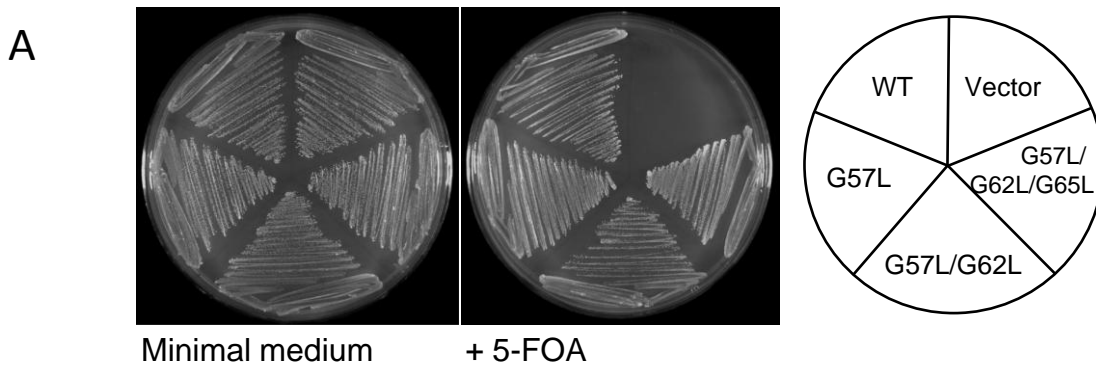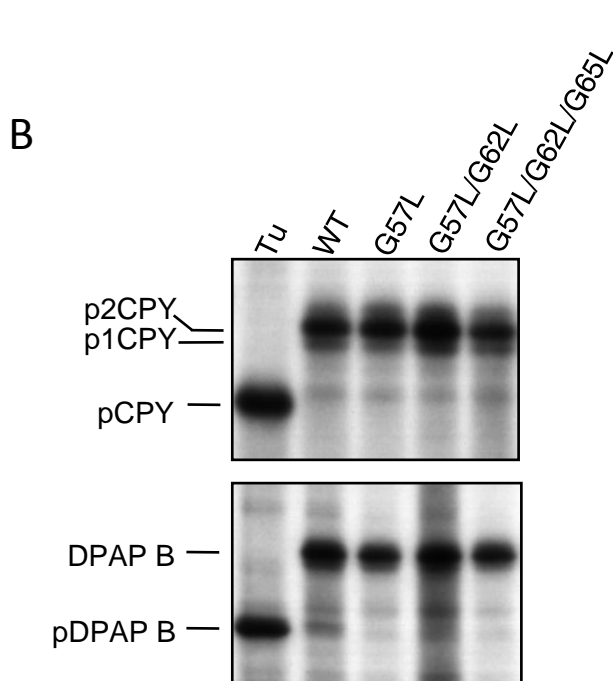

**Figure S1. Functional analysis of *Sss1p* glycerine mutants.** *A*, Vector (pRS313) and plasmids encoding *SSS1*, the G57L, G57L/G62L and G57L/G62L/G65L *sss1* mutations were transformed into the *SSS1* plasmid shuffle strain BWY530. All transformants grew normally after 3 days on minimal medium minus uracil and histidine for selection of the *SSS1*, *URA3* plasmid (FKp53) and the pRS313 (HIS3) transformed plasmids. After 3 days incubation on 5-FOA containing minimal medium, the vector only strain was unable to grow due to the lethality of the  $\Delta$ *sss1* mutation upon FKp53 counter-selection, whilst the transformants containing the wild-type (*SSS1*) and glycerine mutation plasmids grew by providing *Sss1p* function. *B*, After passage on 5-FOA medium, the strains now containing the *SSS1* or glycerine mutations on the pRS313 vector as the sole source of *Sss1p* function were analysed for defects in protein translocation. Whole cell extracts prepared from cells grown at 30°C and <sup>35</sup>S-labelled for 5 min were immunoprecipitated with ppCPY or DPAP B specific antisera and the products were resolved by 10 and 7.5% SDS-PAGE respectively. Upon ER translocation, ppCPY is signal-cleaved and modified by N-linked glycan addition in the ER (p1 CPY) and the Golgi (p2CPY). The type II membrane protein, DPAP B which acquires N-linked glycans upon correct ER membrane integration, and decreases in gel mobility. Tunicamycin (Tu) treatment yields the signal-cleaved, but unglycosylated pro-CPY and the unglycosylated pre form of DPAP B (pDPAP B).

Table S1. Oligonucleotide primers

| Name              | Sequence (5'-3')                                                                      |
|-------------------|---------------------------------------------------------------------------------------|
| <i>SSS1-G1</i>    | CCAAGATTGTCAAGGCTGTTGGTATTCTATTAATTGCAGTCGGTATCATTGG                                  |
| <i>SSS1-G1a</i>   | CCAATGATACCGACTGCAATTAATAGAATACCAACAGCCTTGACAATCTTGG                                  |
| <i>SSS1-G2</i>    | GGTATTCTATTAATTGCAGTCGGTATCATTCTGTACGCCATCAAGTTGATTC                                  |
| <i>SSS1-G2a</i>   | GAATCAACTTGATGCGTACAGAATGATACCGACTGCAATTAATAGAATACC                                   |
| <i>SSS1-G3</i>    | GGCTGTTGGTATTCTATTAATTGCAGTACTTATCATTCTGTACGCCATCAAG                                  |
| <i>SSS1-G3a</i>   | CTTGATGGCGTACAGAATGATAAGTACTGCAATTAATAGAATACCAACAGCC                                  |
| <i>SSS1-ΔC</i>    | AAGGAATACACCAAGATTGTCAAGTAAGTTGGTATTGGTTTAATTGC                                       |
| <i>SSS1-ΔCa</i>   | GCAATTAACCAATACCAACTTACTTGACAATCTTGGTGTATTTCCTT                                       |
| <i>UBC6-2</i>     | TTGGTTATTTGTGTTTCAGAAA                                                                |
| <i>UBC6-3</i>     | GGGGGATCCTGAAGAACTATCATTAGGTTC                                                        |
| <i>SSS1-1</i>     | TTCAAGGTCGTTGGA GAG                                                                   |
| <i>SSS1-4</i>     | GGGGGATCCGCTGTTGGTATTGGTTTAAT                                                         |
| <i>USSS1C</i>     | GGGATCCATGGTTTATATTGGTATCGCTATTTTTTTGTTTTTGGTTGGCCTTTTTAT<br>GAAGTTGATTCATATTCCAATCAG |
| <i>USSS1Ca</i>    | GCAGTAATATTATATGGGAAG                                                                 |
| <i>SSS1-NdeIF</i> | GTATAACATTGAAAAATCATATGGCTAGAGCTAGTG                                                  |
| <i>SSS1-NdeIR</i> | CACTAGCTCTAGCCATATGATTTTTTCAATGTTATAC                                                 |
| <i>Δsss1-1</i>    | TTTACCAAAGATAAAATCACGTATAACATTGAAAAATAAACGTACGCTGCAG<br>GTCGAC                        |
| <i>Δsss1-1a</i>   | GTGCCGTTGTTTTTATTTTTTCTCGTCTTTTATCTCTTATCGATGAATTCGAGCTCG                             |
| <i>SEC61-121</i>  | GCTCAAAAGGTGGCCGCTATTATTCTGATC                                                        |
| <i>SEC61-121a</i> | GATCAGAATAATAGCGGCCACCTTTTGAGC                                                        |
| <i>SEC61-150</i>  | CTCGGATTGCCATCGCCTTGTTGTTAATC                                                         |
| <i>SEC61-150a</i> | GATTAACAACAAGGCGATGGGCAATCCGCG                                                        |
| <i>SEC61-373</i>  | GTCTTGTTTCAGCCGCAGTATTTTCC                                                            |
| <i>SEC61-373a</i> | GGAAAATACTGCGGCTGAACCAAGAAC                                                           |
| <i>SEC61tm9C</i>  | CATTCCAACCTGCTGCATGCTGCTGCGGTGCTACCATC                                                |
| <i>SEC61tm9Ca</i> | GATGGTAGCACCGCAGCAGCAGCATGCAGCAGTTGGAATG                                              |
